# Supplementary material
Source: publisher figshare collection journal article supplement (https://acs.figshare.com/ndownloader/files/4745551)
Supplement: Supplementary file 1 [file 4745551]

## Supporting Information:

The solution concentrations and operating parameters for different block copolymers in the two-fluid electrospinning are listed in Table S1.

| solution concentrations |             | voltage<br>(kV) | plate-to plate<br>distance (cm) | flow rates (ml/min) |       |
|-------------------------|-------------|-----------------|---------------------------------|---------------------|-------|
| P(MMA- <i>ran</i> -MAA) | BCP's       |                 |                                 | shell               | core  |
| 21 wt%                  | SIS, 18 wt% | 31.6            | 45                              | 0.05                | 0.005 |
| 18 wt%                  | SI, 18 wt%  | 30              | 45                              | 0.05                | 0.005 |

**Table S1.** Solution concentrations and operating parameters of two-fluid electrospinning

To view the internal structures, the fibers were either put on TEM grids or embedded in epoxy resin (LR White-Medium Grade, Ladd Research) and microtomed at room temperature or -100 °C into 50-100 nm thick sections. The samples were then stained with osmium tetroxide (OsO<sub>4</sub>) vapor for 1-2 hours and examined using TEM (JEOL JEM200 CX or JOEL 2010F with a Gatan imaging filter).

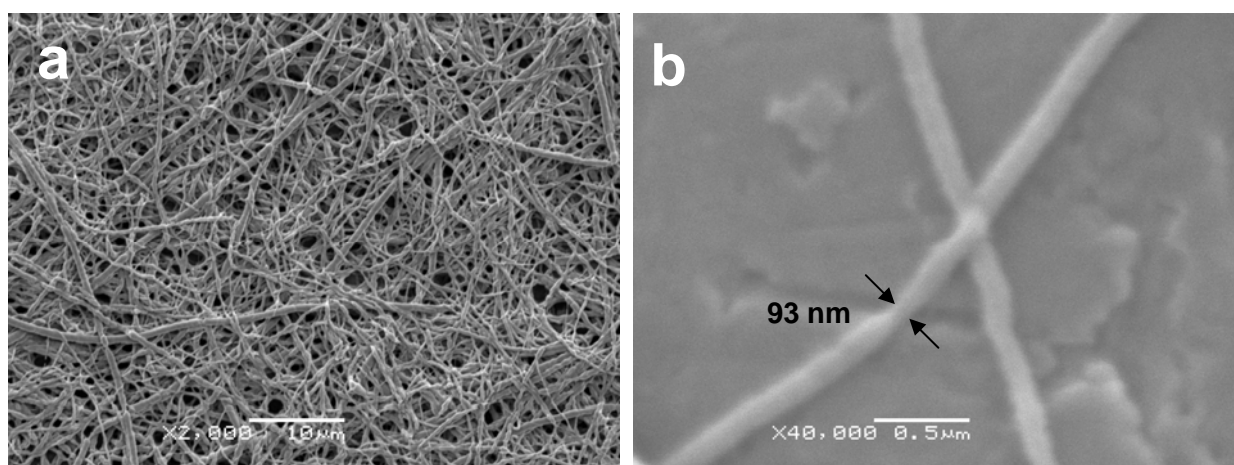

Figure S1. SEM images of the SIS core fibers after annealing and selective dissolution of the P(MMA-*ran*-MAA) shell using methanol. For comparison, see Figure 1 of manuscript, where the same fibers are shown to have a core diameter of approximately 100 nm, consistent with Figure S1(b), and a shell diameter of approximately 500 nm. (Scale bars in a and b are 10 μm and 500 nm,

respectively.)

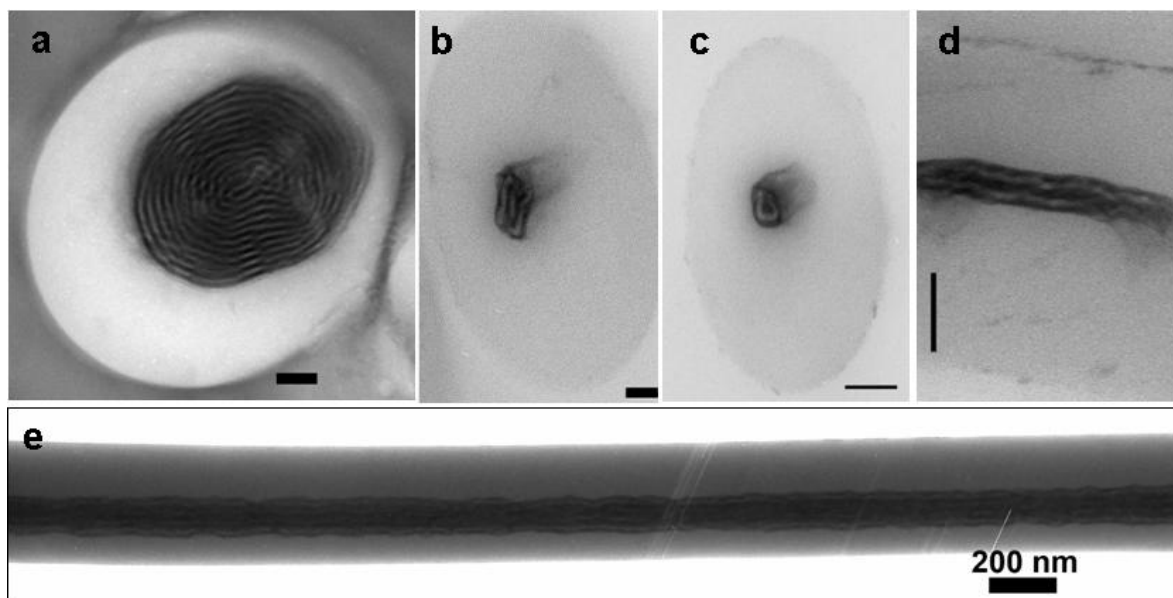

**Figure S2.** TEM images of annealed P(MMA-*ran*-MAA)/SIS fibers showing both core-shell structures and internal structures in the SIS BCP cores. (Scale bars in a-d are 100 nm.)

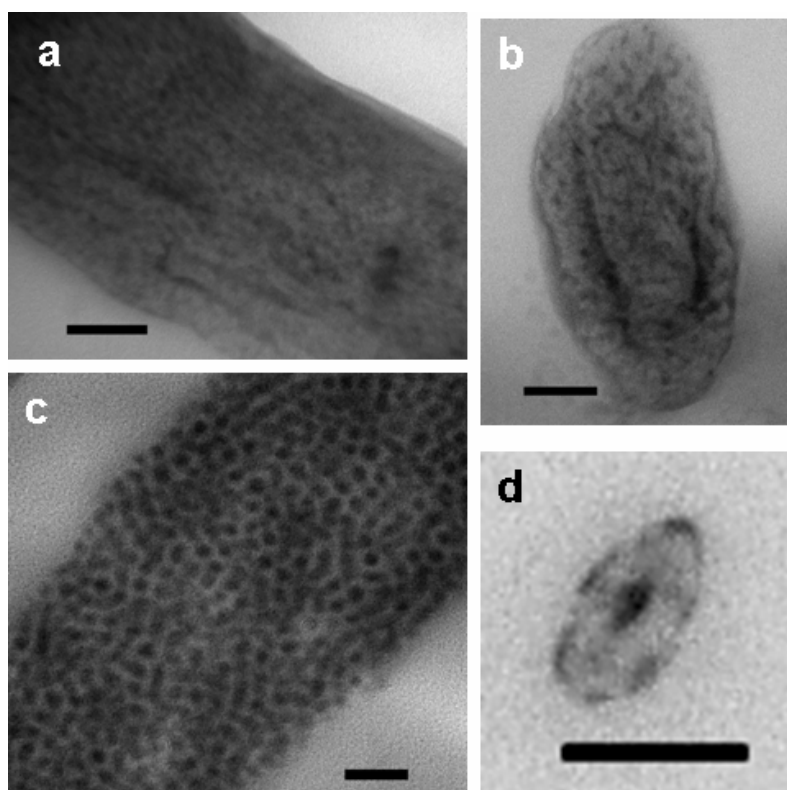

**Figure S3.** TEM images of the sphere-forming SI BCP in as-spun fibers (a and b) and in annealed fibers (c and d); a and c are longitudinal views; b and d are axial view. (Scale bars: 100 nm)
